# Supplementary material
Source: publisher figshare collection journal article supplement (https://tandf.figshare.com/ndownloader/files/15277997)
Supplement: Supplementary file 1 [file 15277997]

S1:Definitions of the indicators used in the Social Deprivation Index.

| **Indicator** | **Definition** |
| --- | --- |
| Basis of home occupation | Proportion of households that are not owner-occupiers or living in rented or assigned property |
| Number of people in the household | Proportion of households consisting of 10 people or more |
| Inadequate sewage disposal | Proportion of households with sewage disposal into a rudimentary cesspit, ditch or gutter, or into a river, a lake or the sea, and without a bathroom |
| Inadequate garbage collection | Proportion of households in which garbage is burned, buried, dumped on vacant land or in rivers, or other destinations |
| Schooling level | Proportion of heads of households with not more than one year of schooling |
| Income level | Proportion of heads of households with an income of half to one minimum monthly salary |
